# Supplementary material for: Relation of Dietary Patterns and Nutritional Profile to Hepatic Fibrosis in a Sample of Lebanese Non-Alcoholic Fatty Liver Disease Patients
Source: MDPI journal article supplement (doi:10.3390/nu14122554), 2022-06-20
Supplement: s1 [file s1]

Archive with 3 entries (3 files):
- File S1.pdf
- File S2.pdf
- File S3.pdf
