# Supplementary material for: Relation of Dietary Patterns and Nutritional Profile to Hepatic Fibrosis in a Sample of Lebanese Non-Alcoholic Fatty Liver Disease Patients
Source: MDPI journal article supplement (doi:10.3390/nu14122554), 2022-06-20
Supplement: s1 [file s1 › File S2.pdf]

| <b>Food Group</b>                           | <b>Included Food</b>                                                                                                                                                                                                                                       |
|---------------------------------------------|------------------------------------------------------------------------------------------------------------------------------------------------------------------------------------------------------------------------------------------------------------|
| <b>Vegetables</b>                           | Tomatoes, tomato juice, tomato sauce, broccoli, cauliflower, cabbage, carrots raw or cooked, corn, onions as a garnish or in salad or cooked, peppers, eggplant, zucchini or summer squash, spinach cooked or raw, icebergs or leaf lettuce                |
| <b>Chickpeas, red beans, lentils, peas</b>  | Fresh chickpeas, red beans, fresh lentils, peas                                                                                                                                                                                                            |
| <b>Fruits and fruit juices</b>              | Bananas, raisins, grapes, apples, pears, prunes, dried plums, oranges, fresh strawberries, peaches, figs, grapefruit, grapefruit juices, apricots, orange juice or other fruit juices, dates (Mejdool), avocado, cantaloupe, watermelon, cherry, raspberry |
| <b>Vegetable oil/olives</b>                 | Vegetable oil, tahini, olives                                                                                                                                                                                                                              |
| <b>Fish and sea food</b>                    | Fish, tuna steak, canned tuna, shrimps, lobster                                                                                                                                                                                                            |
| <b>Almonds, walnuts, hazelnuts, sesames</b> | Almonds, walnuts, or other nuts                                                                                                                                                                                                                            |
| <b>Desserts, arabic pastries</b>            | Dark chocolate, doughnuts, cake or pie (homemade or ready-made), Arabic pastries                                                                                                                                                                           |
| <b>Beef meat</b>                            | Beef steak or roast                                                                                                                                                                                                                                        |
| <b>Hamburger</b>                            | Hamburger                                                                                                                                                                                                                                                  |
| <b>Fries</b>                                | fries                                                                                                                                                                                                                                                      |
| <b>Pork</b>                                 | Pork, bacon                                                                                                                                                                                                                                                |
| <b>Pizza</b>                                | Pizza                                                                                                                                                                                                                                                      |
| <b>Spaghetti or noodles or cooked rice</b>  | Spaghetti or noodles, cooked brown or white rice                                                                                                                                                                                                           |
| <b>Chicken</b>                              | Chicken or turkey sandwich                                                                                                                                                                                                                                 |
| <b>Carbonated beverages</b>                 | Coke, carbonated beverage                                                                                                                                                                                                                                  |
| <b>Pies, fatayer</b>                        | Pies, fatayer (kind of pies)                                                                                                                                                                                                                               |
| <b>1 chicken egg</b>                        | 1 chicken egg                                                                                                                                                                                                                                              |
| <b>Fresh cream</b>                          | Cream, non-dairy coffee whitener                                                                                                                                                                                                                           |
| <b>Mayonnaise or mustard</b>                | Mayonnaise or mustard                                                                                                                                                                                                                                      |
| <b>Ketchup</b>                              | Ketchup                                                                                                                                                                                                                                                    |
| <b>Chips</b>                                | Chips                                                                                                                                                                                                                                                      |
| <b>Hot dog</b>                              | Hot dog                                                                                                                                                                                                                                                    |
| <b>Energy drink</b>                         | Energy drink                                                                                                                                                                                                                                               |
| <b>Ham</b>                                  | Ham                                                                                                                                                                                                                                                        |
| <b>Milk chocolate</b>                       | Milk chocolate                                                                                                                                                                                                                                             |
